# Supplementary material for: The Co d-band center modulation of LaCoO3−δfor improved peroxymonosulfate activation
Source: Royal Society of Chemistry journal article supplement (doi:10.1039/d3cy00664f), 2023-01-01
Supplement: d3cy00664f1.pdf [file d3cy00664f1.pdf]

**Supporting information for**

**The Co d-band center modulation of LaCoO<sub>3-δ</sub> for improved  
peroxymonosulfate activation**

Ping Liang<sup>a</sup>, Qina Yang<sup>a</sup>, Fanping Kong<sup>a</sup>, Zhida Liang<sup>b</sup>, Xuyao Niu<sup>a</sup>, Yongjian Zhu<sup>a</sup>,  
Chaoqun Ren<sup>a</sup>, Chi Zhang<sup>a,\*</sup>

<sup>a</sup>School of Applied Physics and Materials, Wuyi University, Jiangmen, China

<sup>b</sup>Department of Materials Science and Metallurgy, CB3 0FS, Cambridge University,  
UK

**Email address:**

Chi

Zhang:

[chizhang@wyu.edu.cn](mailto:chizhang@wyu.edu.cn)

### **Text S1. Chemicals**

Bisphenol A (BPA, 99.8%), lanthanum nitrate hexahydrate ( $\text{La}(\text{NO}_3)_3 \cdot 6\text{H}_2\text{O}$ , 99.99%), cobalt nitrate hexahydrate ( $\text{Co}(\text{NO}_3)_2 \cdot 6\text{H}_2\text{O}$ , 99.99%), ammonium biphosphate ( $\text{NH}_4\text{H}_2\text{PO}_4$ , 99.99%), tert-butyl alcohol (TBA, 99.5%), citric acid (99.5%), Ethylenediaminetetraacetic acid (EDTA, 99.5%), ammonia solution (25%), anhydrous sodium sulfate ( $\text{Na}_2\text{SO}_4$ , 98%), humic acid (HA), sodium chloride (NaCl, 99.5%), sodium dihydrogen phosphate ( $\text{NaH}_2\text{PO}_4$ , 99.0%), sodium bicarbonate ( $\text{NaHCO}_3$ , 99.5%), sodium phosphate dibasic ( $\text{Na}_2\text{HPO}_4$ , 99.0%), potassium iodide (KI, 99.99%), deuterioxide ( $\text{D}_2\text{O}$ , 99.9%), methanol (99.8%) and sodium hydroxide (NaOH,  $\geq 98\%$ ) were purchased from Aladdin. 5,5-Dimethyl-1-pyrroline N-oxide (DMPO,  $\geq 98\%$ ) was obtained from Sigma-Aldrich. Potassium peroxymonosulfate ( $\text{KHSO}_5$ ,  $\geq 98\%$ ), furfuryl alcohol (FFA, 98%), p-benzoquinone (p-BQ, 97%), and 2,2,6,6-tetramethyl-4-piperidinol (TMP, 99%) were purchased from Macklin. Hydrochloric acid (HCl, 36%) was bought from Guangzhou Chemical Reagent Factory. All the chemicals were used directly without further purification.

### **Text S2. The procedures of $\text{NH}_3$ -TPD, $\text{CO}_2$ -TPD, and $\text{H}_2$ -TPR**

Temperature-programmed desorption and reduction were performed on an AutoChem1 II 2920 instrument. For  $\text{NH}_3$ -TPD, the catalyst (50–100 mg) was preheated at 300 °C at a heating speed of 10 °C/min and purged with He flow (30 mL/min) for 1 h. After cooling to 30 °C, an  $\text{NH}_3$ /He mixture (30 mL/min) was fed in for 1 h until saturation. Then the weak physically adsorbed  $\text{NH}_3$  on the surface was removed by He flow purge for 1 h. Finally, the  $\text{NH}_3$  was desorbed and detected at 800 °C in He atmosphere at a heating rate of 10 °C/min.

For  $\text{CO}_2$ -TPD, the catalyst (100 mg) was preheated at 300 °C at a heating speed of 10 °C/min and purged with He flow (50 mL/min) for 2 h. After cooling to 100 °C, ventilate the  $\text{CO}_2$  (50 mL/min) for 1h, and switch over the He airflow (50 mL/min) to purge for 1h. After dropping to room temperature and leveling the baseline, the sample rose to 800 °C at 10 °C/min, and the flowing gas was detected by TCD.

For  $\text{H}_2$ -TPR, the catalyst was dried at 500 °C for 2 h at a heating rate of 10 °C/min, swept by a He flow (50 mL/min). After cooling to room temperature, a 10%  $\text{H}_2$ /Ar

mixture (50 mL/min) was provided for 30 min. After the baseline got stable, the sample was treated at 800 °C in the 10% H<sub>2</sub>/Ar mixture with a heating rate of 10 °C/ min.

**Text S3.** The iodometric titration experiments

The catalysts (0.01 g) and KI powder (0.03 g) were mixed in a cone bottle and dissolved by diluted hydrochloric acid (~18%). Then a certain amount of starch solution was added to the dissolved solution above, and titration was initiated using Na<sub>2</sub>S<sub>2</sub>O<sub>3</sub> solution (0.01 mol/L).

The  $\delta$  value was calculated as follows:

Reaction:

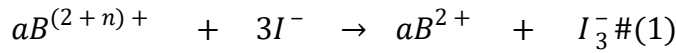

$$\frac{m}{M_0} = \frac{1}{a} \times \frac{m}{M_0}$$

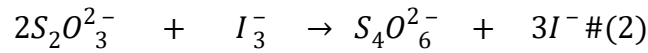

$$\frac{2}{a} \times \frac{m}{M_0} = \frac{1}{a} \times \frac{m}{M_0}$$

Calculation:

$$a \times (2 + n) - 3 = a \times 2 - 1 \quad \text{charge balance of reaction (1)}$$

$$a = \frac{2}{n}$$

$$2 \times (3 - \delta) = 3 + 2 + n \quad \text{charge balance of LCO (2)}$$

$$2 \times (3 - \delta) = 3 + (2 + n) \times 0.8 + 3 \times 0.2 \quad \text{charge balance of LC}_{0.8}\text{P}_{0.2}\text{O (2)}$$

$$\delta(LCO) = \frac{1 - n}{2} \quad \delta(LC_{0.8}P_{0.2}O) = 0.4 - 0.4n$$

$$C(Na_2S_2O_3) \times V(Na_2S_2O_3) = \frac{2}{a} \times \frac{m}{M_0} \quad \text{molar balance of reaction (1) and (2)}$$

$$\text{So, } \delta(LCO) = 0.5 - \frac{M_0 CV}{2m} \quad \delta(LC_{0.8}P_{0.2}O) = 0.4 - \frac{0.4M_0 CV}{m}$$

m: the weight of perovskite powder

M<sub>0</sub>: the molecular weight of catalysts (LCO, LC<sub>0.8</sub>P<sub>0.2</sub>O)

C: the molarity of Na<sub>2</sub>S<sub>2</sub>O<sub>3</sub>

V: the volume of  $\text{Na}_2\text{S}_2\text{O}_3$  used for titration

**Text S4.** The concentration testing of the PMS

The solution containing  $\text{NaHCO}_3$  (1.2 g/L) and KI (4.98 g/L) was prepared. At a given time interval, 0.1 mL of the reaction solution was extracted and filtered with a film (0.45  $\mu\text{m}$ ). Then the clear liquid was injected into 4.9 mL of the  $\text{NaHCO}_3/\text{KI}$  solution. After shaking for a while, the samples were tested with an ultraviolet and visible (UV-vis) spectrophotometer.

**Text S5.** The electrochemical tests

The i-t curves were obtained at a CHI760E electrochemical workstation. A standard three-electrode electrochemical cell assembly includes a reference electrode (Ag/AgCl), a counter electrode (platinum sheet), and a working electrode. The working electrode is covered with 20  $\mu\text{L}$  of catalyst ink which was prepared as follows: 5 mg of catalyst powder, 5 mg of conductive carbon black, 1 mL of isopropanol, 0.5 mL of Nafion (0.5 wt.%) were mixed and sonicated until forming a uniform ink. The i-t tests were performed at 0.00 V *vs.* Ag/AgCl in the  $\text{Na}_2\text{SO}_4$  electrolyte (50 mM). After the first 200 s, PMS was added into the electrolyte, and BPA was subsequently joined in the  $\text{Na}_2\text{SO}_4/\text{PMS}$  solution after 400 s.

**Table S1.** The oxygen components on the surface of LCO and  $\text{LC}_{0.8}\text{P}_{0.2}\text{O}$ .

| Samples                          | LCO    | $\text{LC}_{0.8}\text{P}_{0.2}\text{O}$ |
|----------------------------------|--------|-----------------------------------------|
| M-O                              | 40.35% | 28.09%                                  |
| $\text{O}_\text{V}$              | 53.29% | 65.34%                                  |
| $\text{H}_2\text{O}/\text{CO}_2$ | 6.37%  | 6.56%                                   |

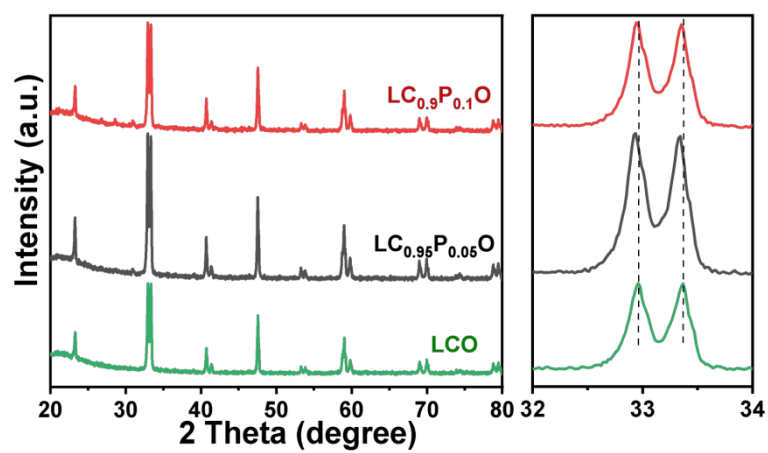

**Fig. S1** XRD patterns of LCO,  $\text{LC}_{0.95}\text{P}_{0.05}\text{O}$  and  $\text{LC}_{0.9}\text{P}_{0.1}\text{O}$ .

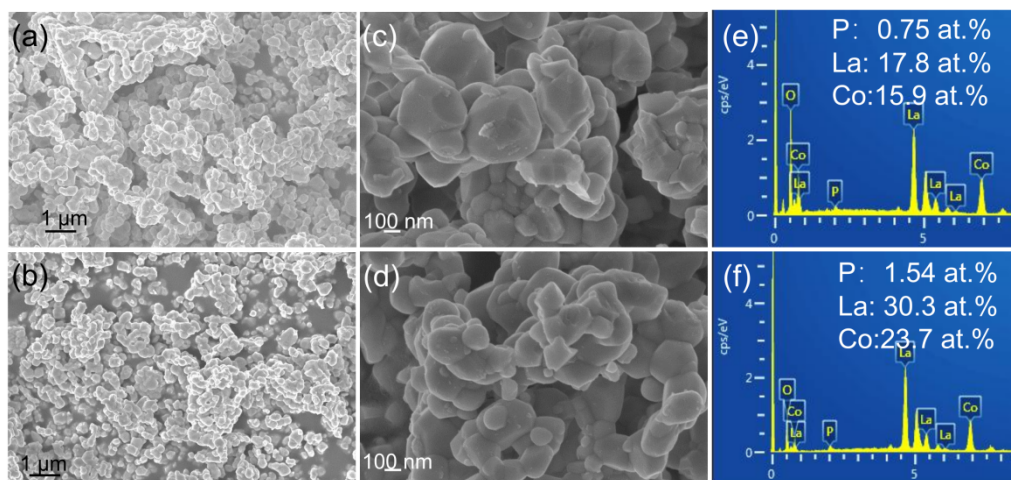

**Fig. S2** SEM images (a-d) and EDS spectra (e and f) of  $\text{LC}_{0.95}\text{P}_{0.05}\text{O}$  (a, c, e) and  $\text{LC}_{0.9}\text{P}_{0.1}\text{O}$  (b, d, f).

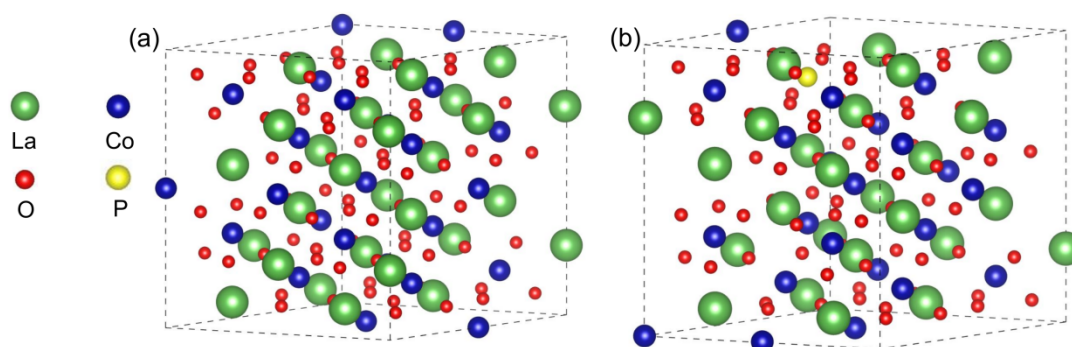

**Fig. S3** Crystal structures of LCO (a) and P-LCO (b) after structural optimization.

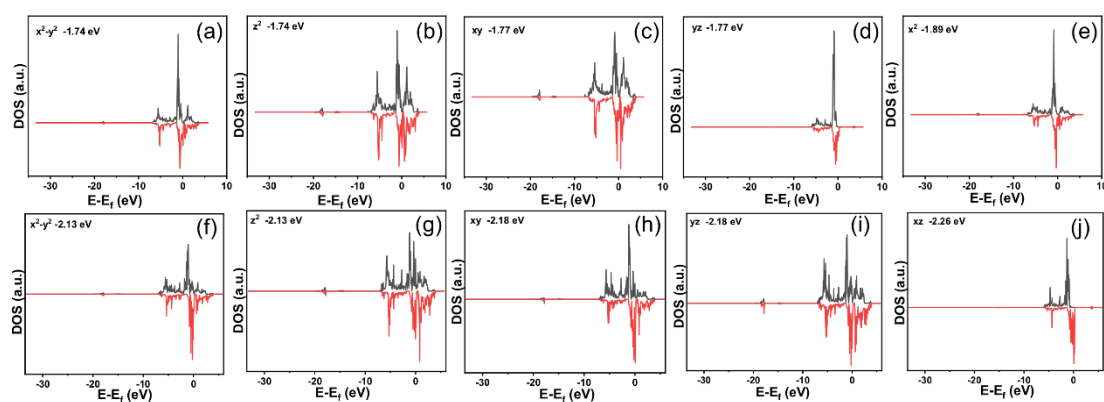

**Fig. S4** The DOS of suborbitals of P-LCO (a–e) and LCO (f–j).

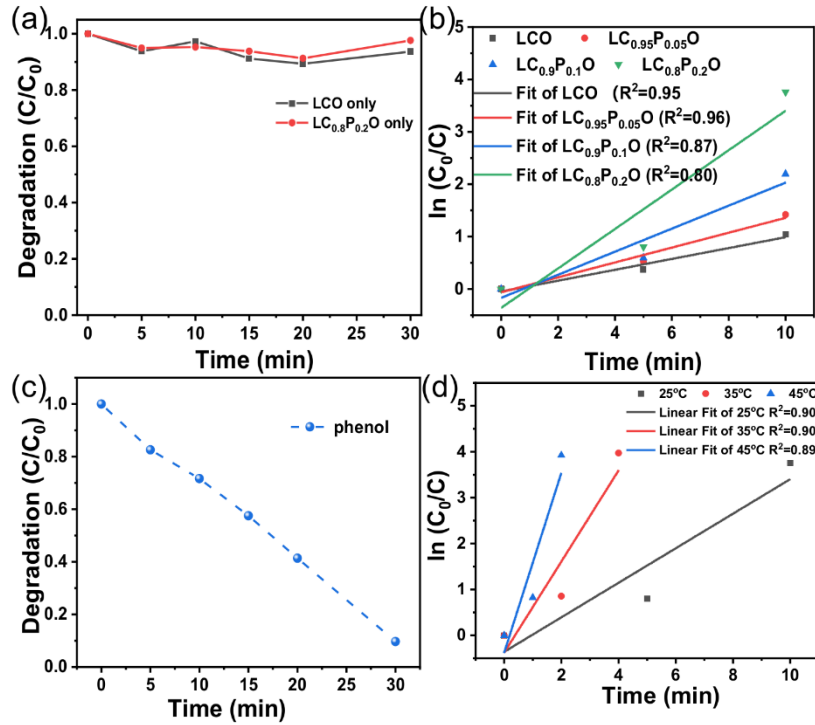

**Fig. S5** The adsorption of LCO and LC<sub>0.8</sub>P<sub>0.2</sub>O (a), fitting lines and reaction kinetics of the catalysts (b), the catalytic degradation of phenol (c) and fitting lines at different reaction temperatures (d) on LC<sub>0.8</sub>P<sub>0.2</sub>O. Reaction conditions: [catalysts] = 0.1 g/L, [PMS] = 3.25 mM, [phenol] = 20 ppm, T = 25 °C.

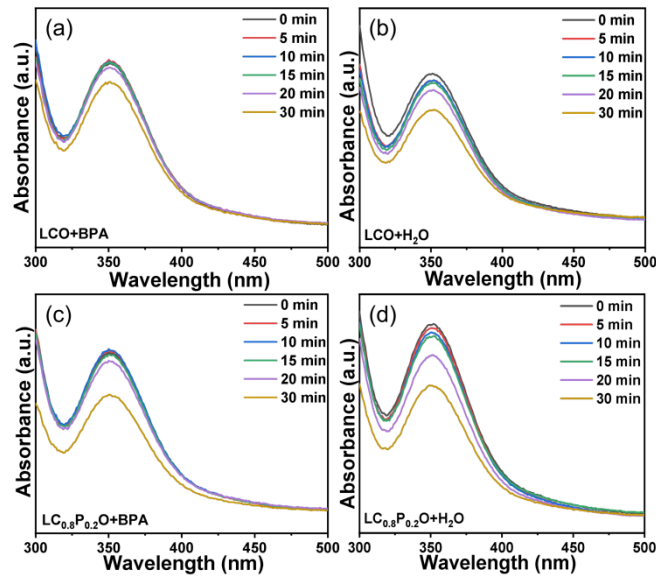

**Fig. S6** The UV-vis spectra of PMS under different reaction conditions. Reaction conditions: [Initial PMS] = 3.25 mM, [BPA] = 20 ppm, T = 25 °C

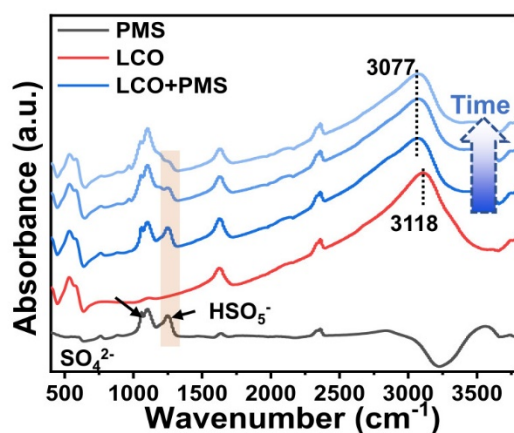

Fig. S7 The ATR-FTIR spectra of LCO/PMS system.

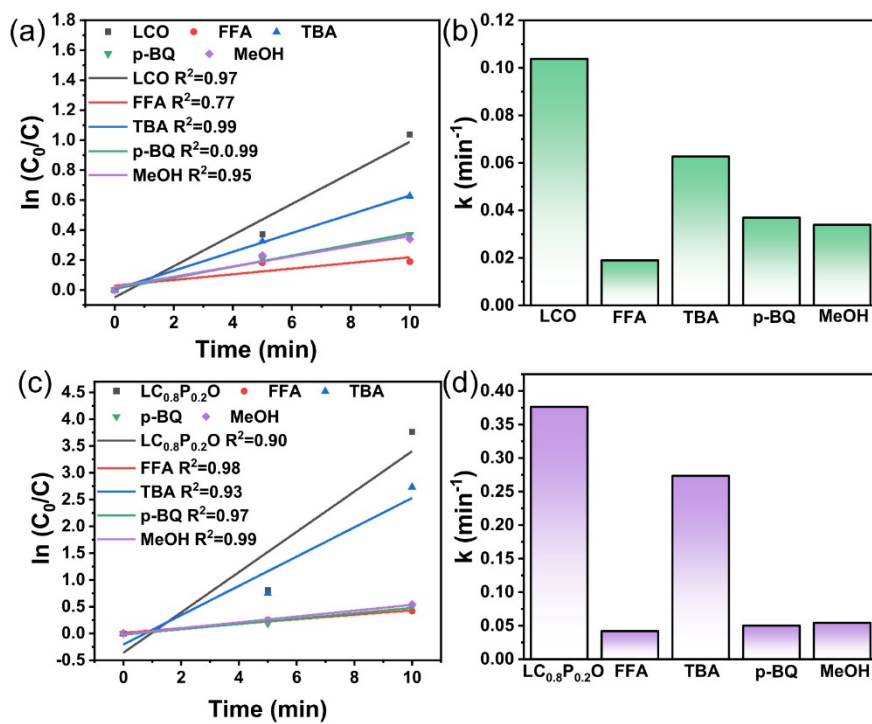

Fig. S8 The first-order reaction kinetic fitting (a, c) and rates (b, d) of quenching results for LCO (a, b) and  $\text{LC}_{0.8}\text{P}_{0.2}\text{O}$  (c, d).
